# Supplementary material
Source: Springer Nature journal article supplement (https://www.springermedizin.de/resource/supplementary/12974_2011_378_MOESM5_ESM.pdf/9601540)

**A**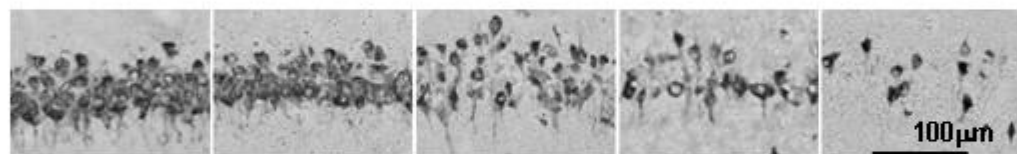**Control****Day 2****Day 3****Day 5****Day 14****B**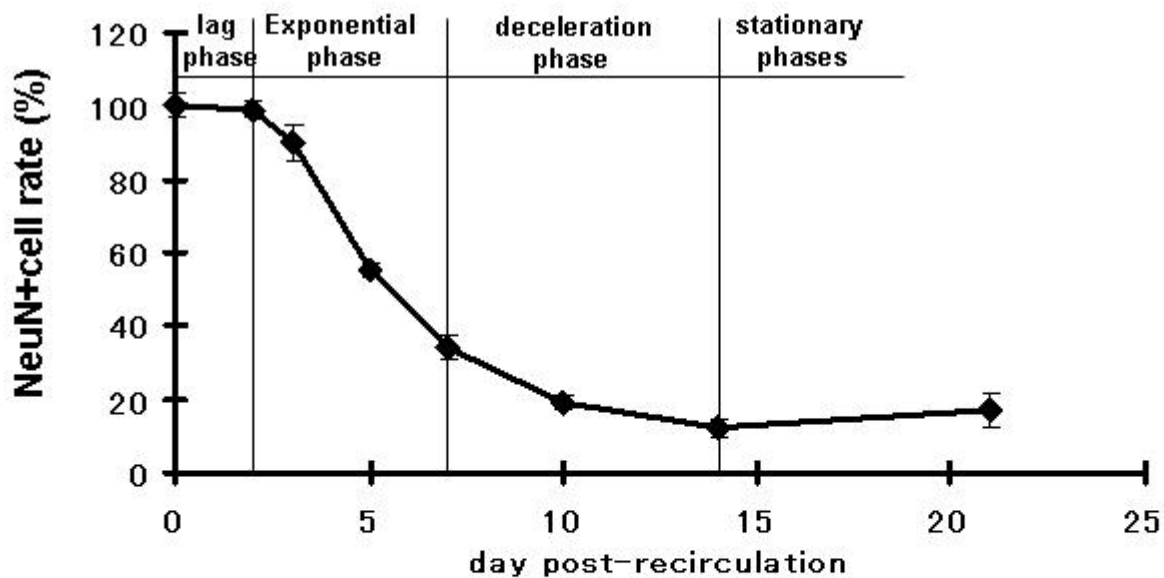

Supplement: MOESM5 [file 9601540]
